# Supplementary material
Source: MDPI journal article supplement (https://www.mdpi.com/2313-0105/6/3/36)
Supplement: s1 [file s1]

# Supplementary Information

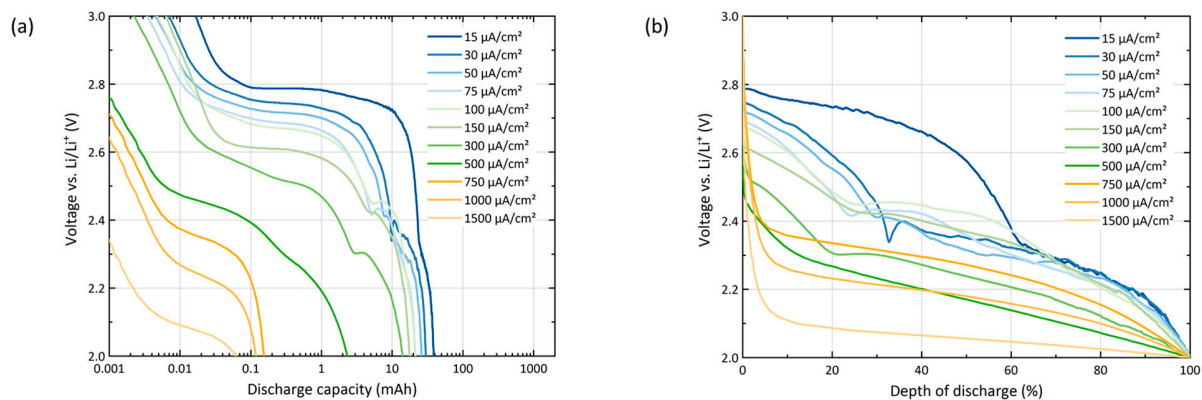

**Figure S1:** (a) Logarithmic representation and (b) normalized discharge profiles of GNS-foam electrodes with current densities between 15  $\mu\text{A}/\text{cm}^2$  and 1.5  $\text{mA}/\text{cm}^2$ .

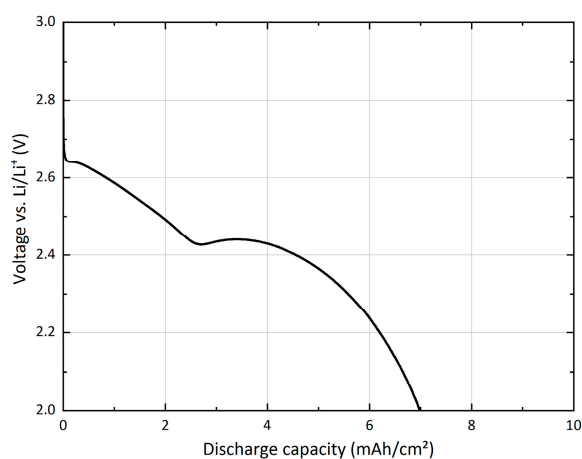

**Figure S2:** Discharge profile of a GNS-foam electrode at 150  $\mu\text{A}/\text{cm}^2$  and an oxygen pressure of 11 atm.

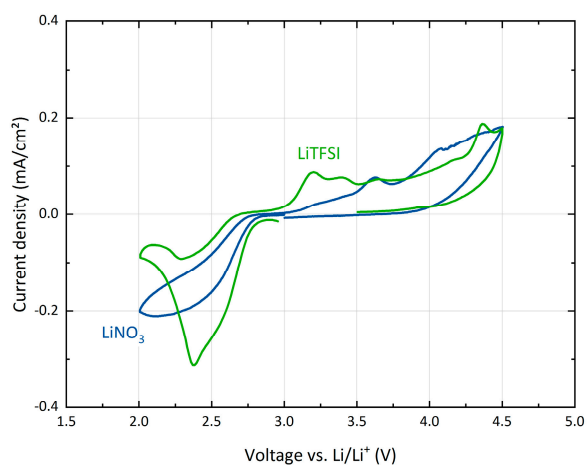

**Figure S3:** Cyclic voltammetry  $j(U)$  profile for Li-O<sub>2</sub> cells with GNS-foam electrodes in combination with 200  $\mu$ L of either 1.0 M LiTFSI or 0.5 M LiNO<sub>3</sub> in TEGDME as electrolyte. The CV measurements are carried out with a Zahner IM6 potentiostat. The sweep rate is 100  $\mu$ V/s and tests start with a negative sweep from the equilibrium potential of the cell ( $\approx$  3 V).

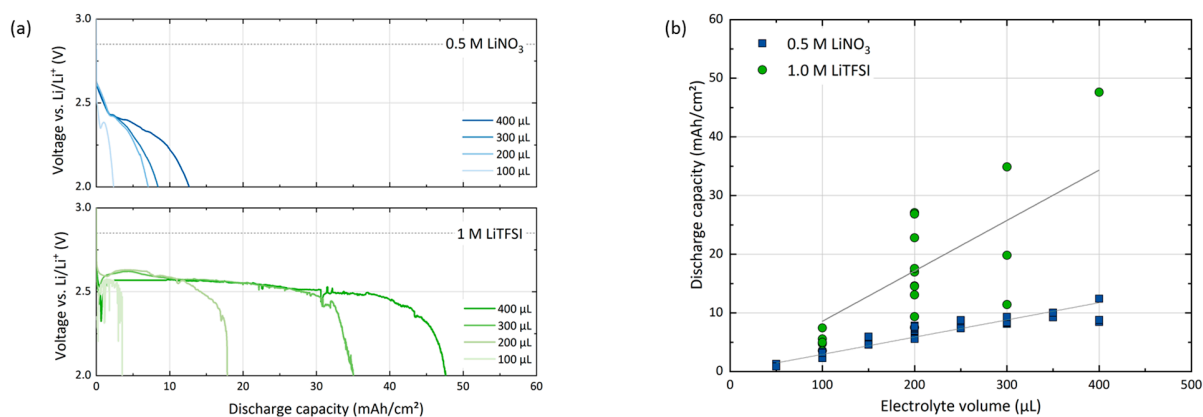

**Figure S4:** Effects of the electrolyte volume (100  $\mu$ L – 400  $\mu$ L) on the discharge capacity of GNS-foam electrodes.

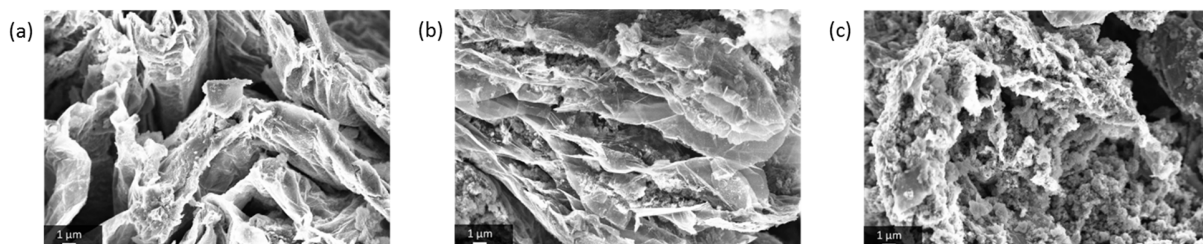

**Figure S5:** Three GNS-foam electrodes were stacked in a single cell and discharged to 56.2 mAh/cm<sup>2</sup>. The figure shows the SEM images of GNS from the top (a), middle (b) and bottom (c) electrode.
